# Supplementary material
Source: PubMed Central journal article supplement (PMC9691621)

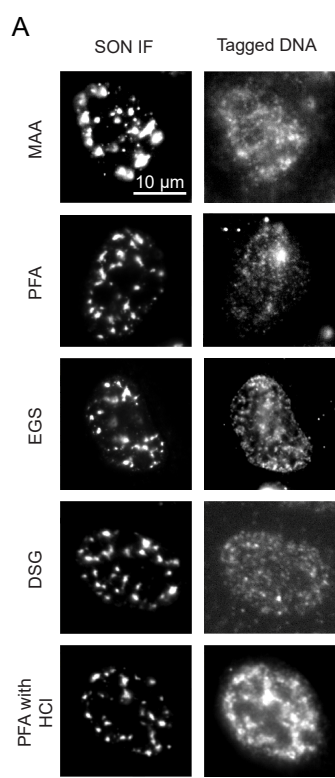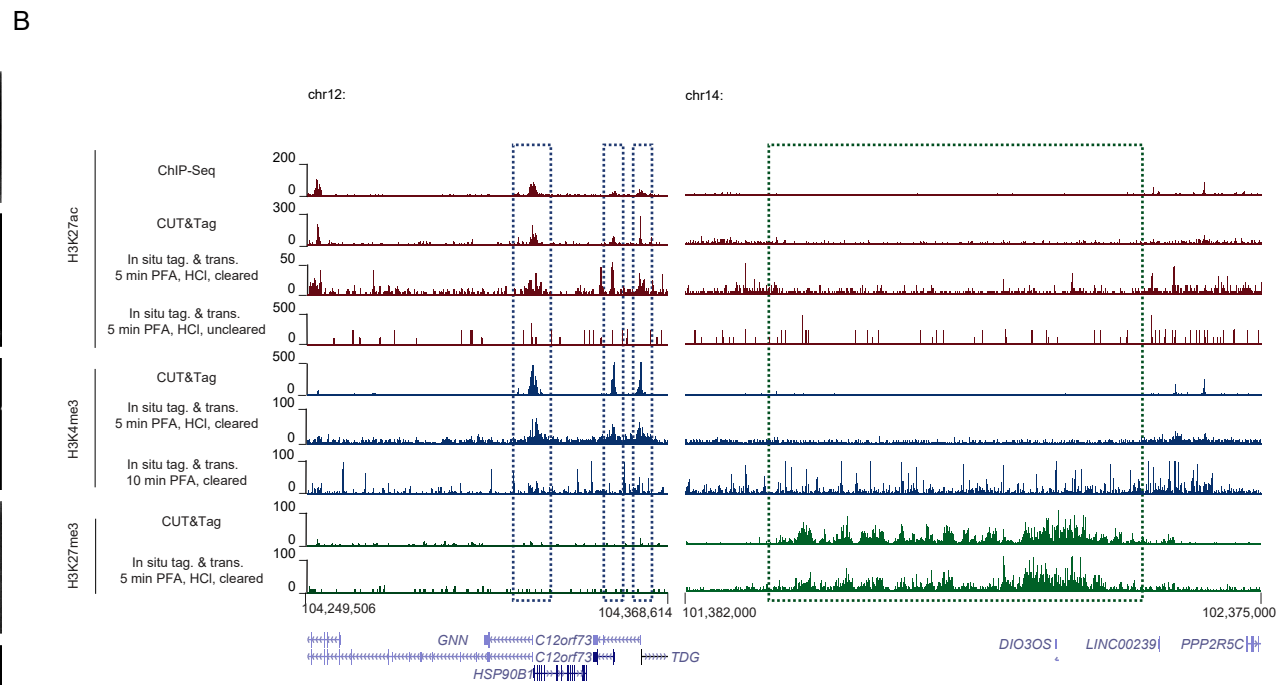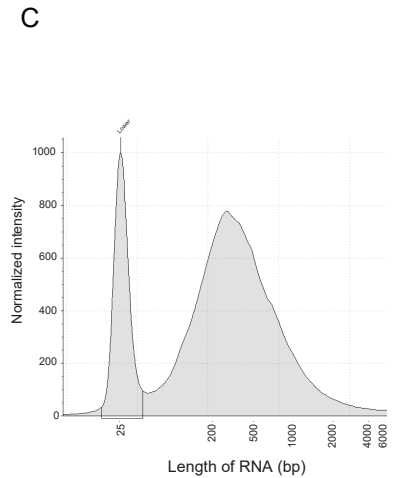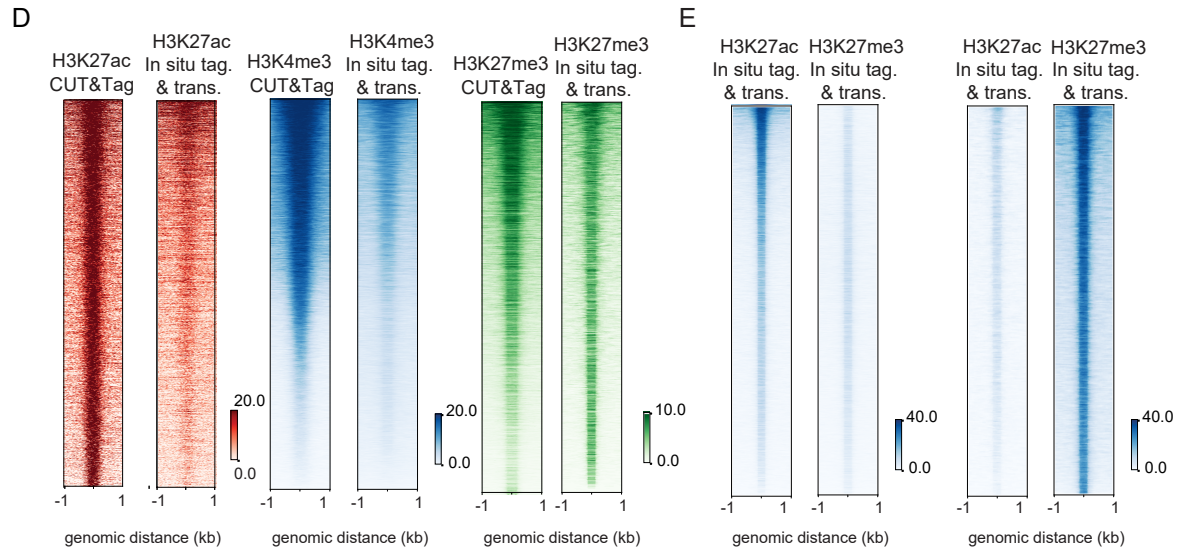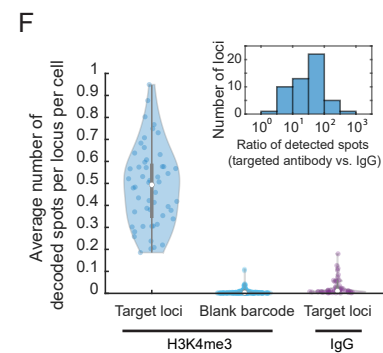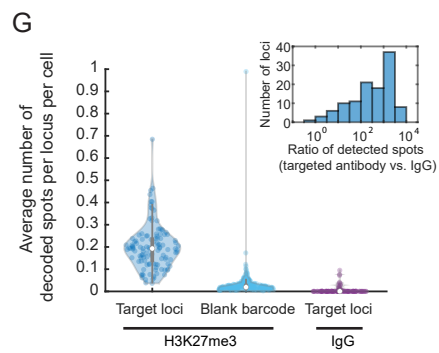

Supplement: NIHMS1843013-supplement-1.pdf [file NIHMS1843013-supplement-1.pdf]

**A**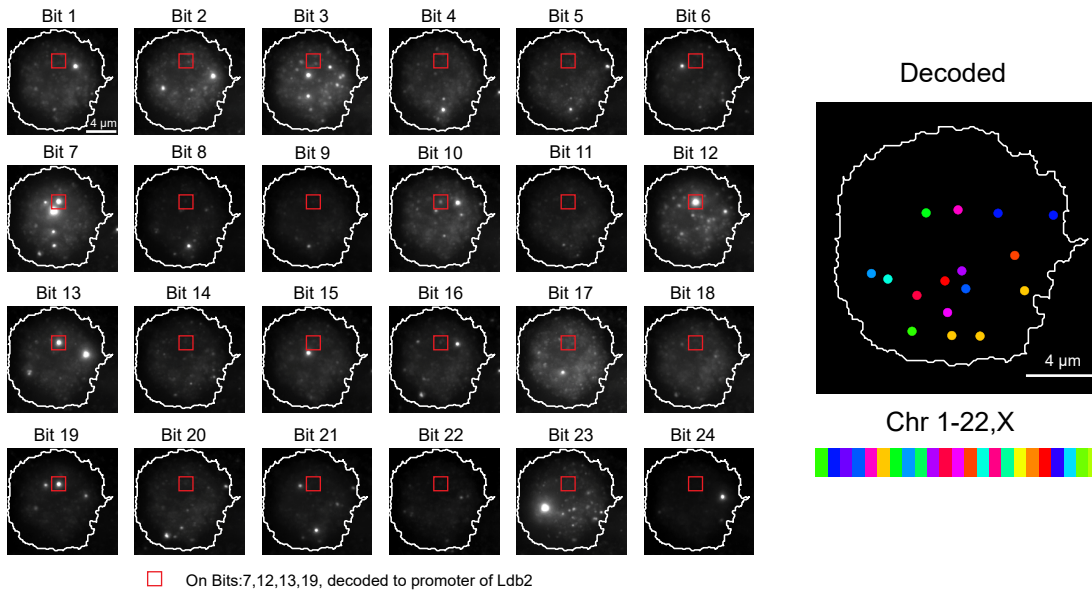**B**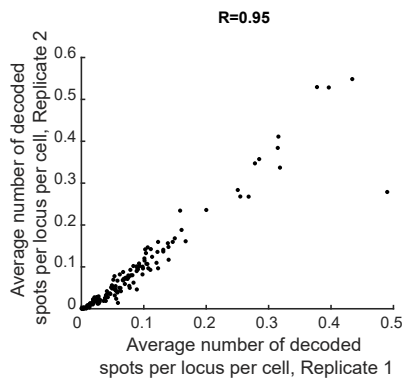**C**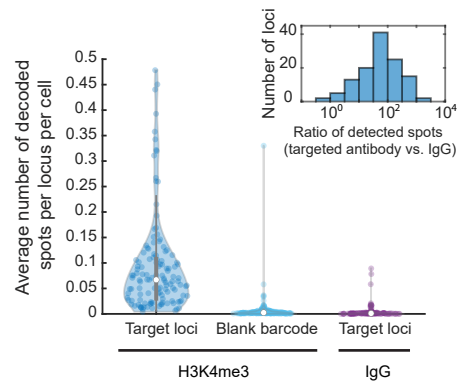

Supplement: NIHMS1843013-supplement-2.pdf [file NIHMS1843013-supplement-2.pdf]

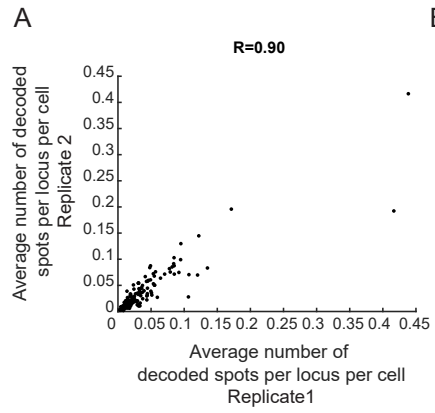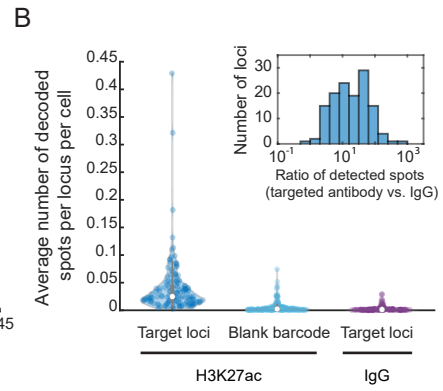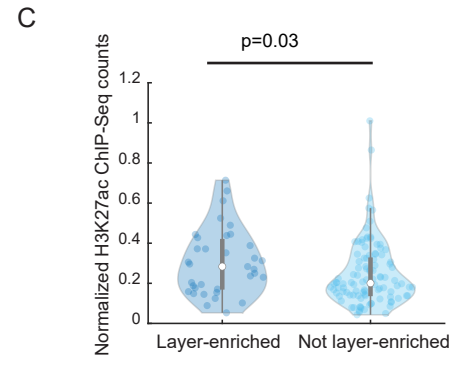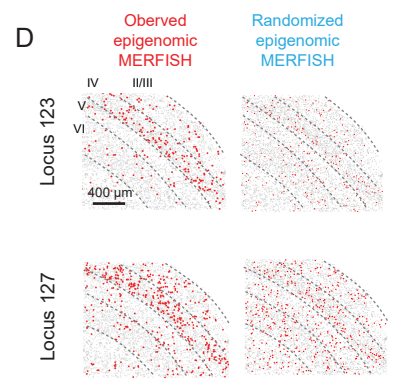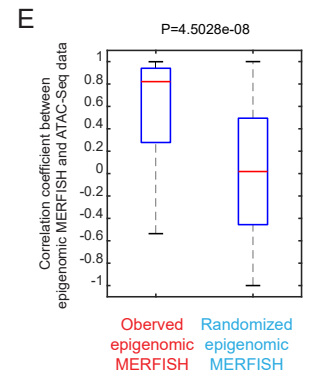

Supplement: NIHMS1843013-supplement-5.pdf [file NIHMS1843013-supplement-5.pdf]
